# Supplementary material for: A novel approach for testing the teratogenic potential of chemicals on the platform of metabolomics: studies employing HR-MAS nuclear magnetic resonance spectroscopy
Source: Royal Society of Chemistry journal article supplement (doi:10.1039/c5ra00671f), 2015-01-01
Supplement: c5ra00671f1.pdf [file c5ra00671f1.pdf]

## Supplementary information (S.I.)

### S.I. Figures

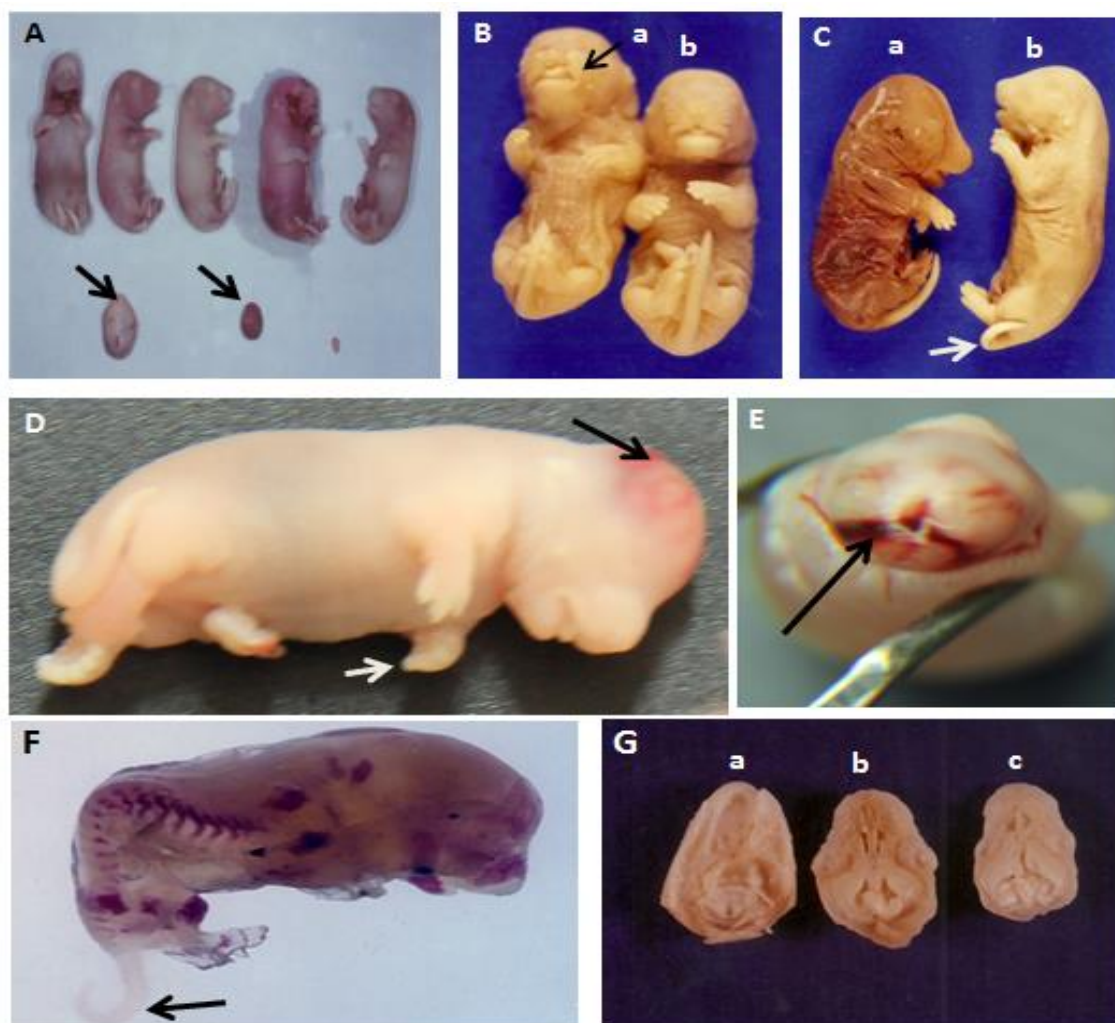

**S.I. Fig. 1. Anomalies and malformations observed among fetuses from dams exposed to various doses of CP –**

**A-** Litters from a dam treated with CP intermediate dose (15mg/kg/B.wt) arrows showing resorption.

**B-** Pup from CP intermediate dose treated dams showing – **a-** cleft lip & **b-** normal pup from same dam .

**C-** Pups from high dose CP treated dam – **a-** case of still birth & **b-** pup from same group showing curling of tail.

**D-** A case of cranial hematoma with wrist drop from dam treated with high dose CP.

**E-** A foetus from CP-HD treated dam exhibiting exencephaly.

**F-** Alizarin preparation of a pup from CP-HD treated dam showing overall deformity of bones – typical case of scoliosis along with curling of tail.

**G-** Palate Slices of three different pups from dams treated with High dose of CP  
**a-** Normal palate and **b** & **c-** showing cleft palate.

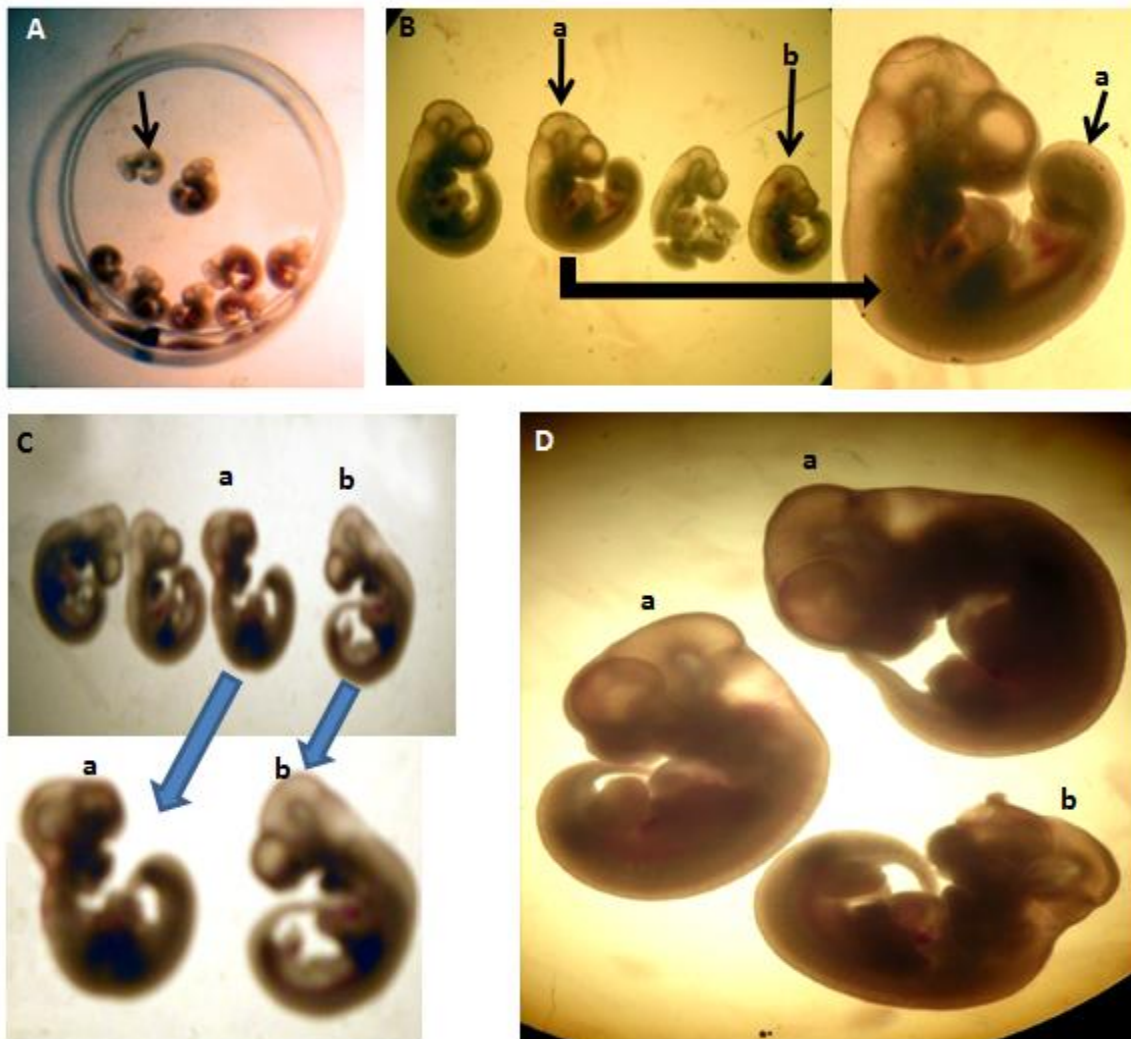

**S.I. Fig. 2: Anomalies and malformations observed among embryos from control and various CP treated groups –**

**A-** Embryos from control group dam treated with distilled water (DW) by i.p route out of which one is having stunted growth indicated by arrow.

**B-** Embryos from dams treated with low dose (5mg/kg-bwt/i.p) showing **a**- curling of tail & **b**- stunted growth.

**C-** Embryos from dam treated with high dose (30mg/kg-bwt/i.p) of CP showing **a**- neural tube defect (NTD) and craniofacial defect both and **b**- normal embryo

**D-** Embryos from intermediate dose (15 mg/kg-bwt/i.p) treated dam showing **a**- normal neural tube and **b**- NTD.

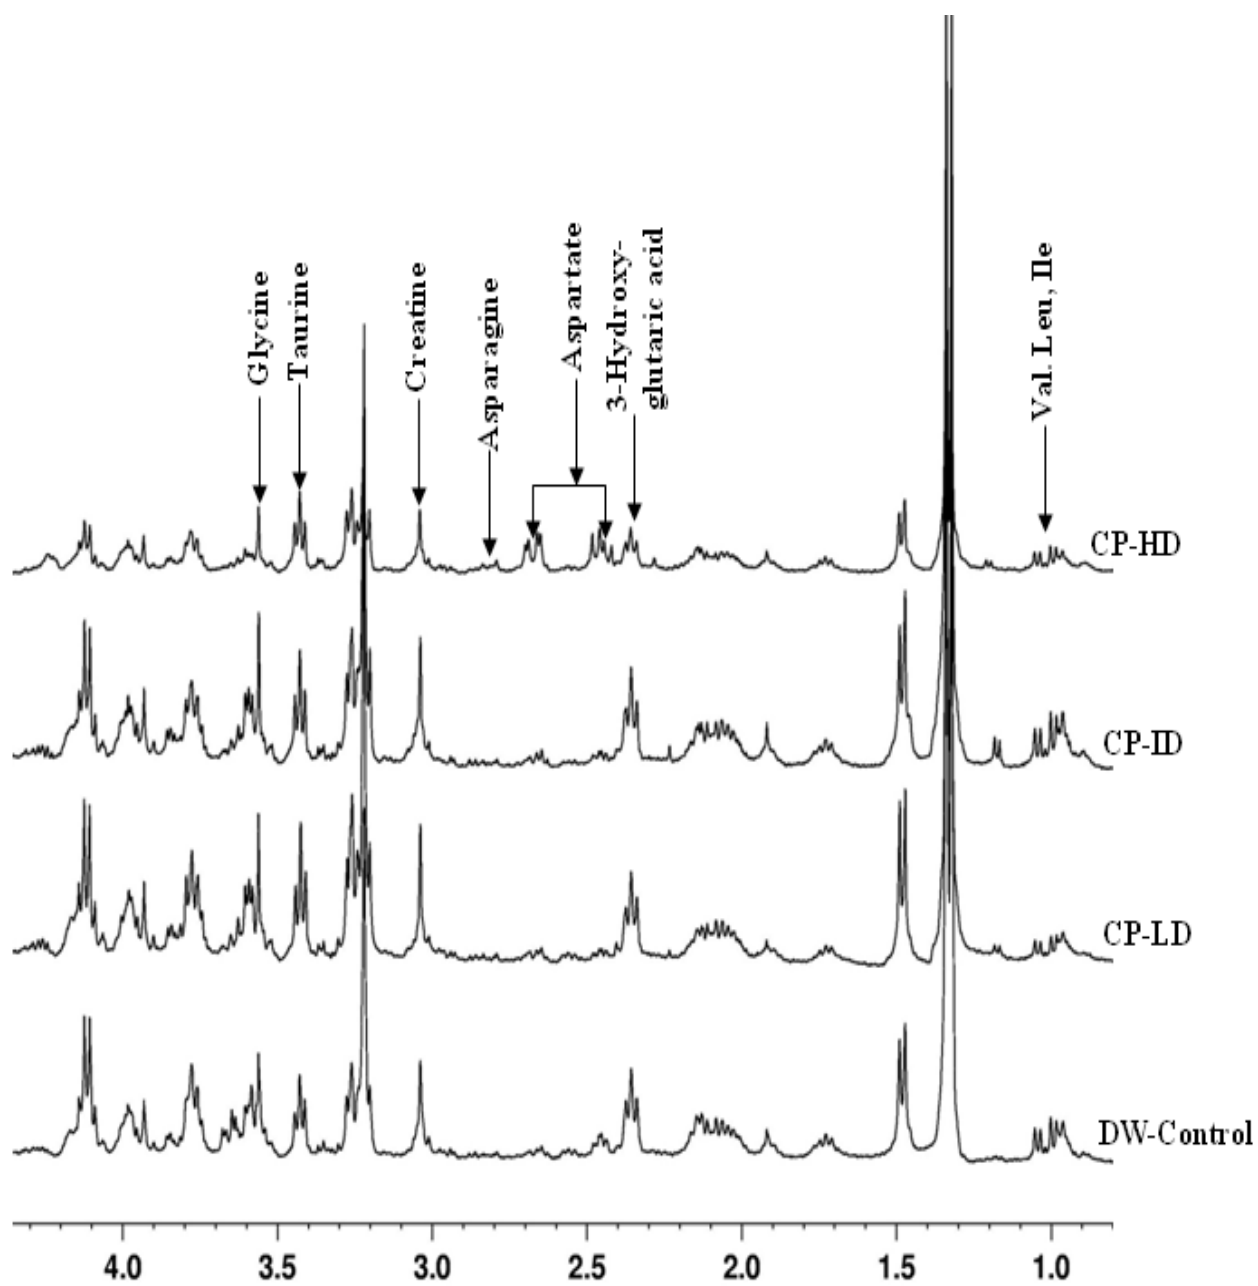

**S.I Fig. 3:** Representative CPMG  $^1\text{H}$  NMR spectra of DW-control, CP-LD, CP-ID and CP-HD coded embryos showing assignments of metabolites in 0.8 - 4.2 ppm.

Cyclophosphamide (30 mg/kg B.wt.)  
Rat # 2 Embryo # 3

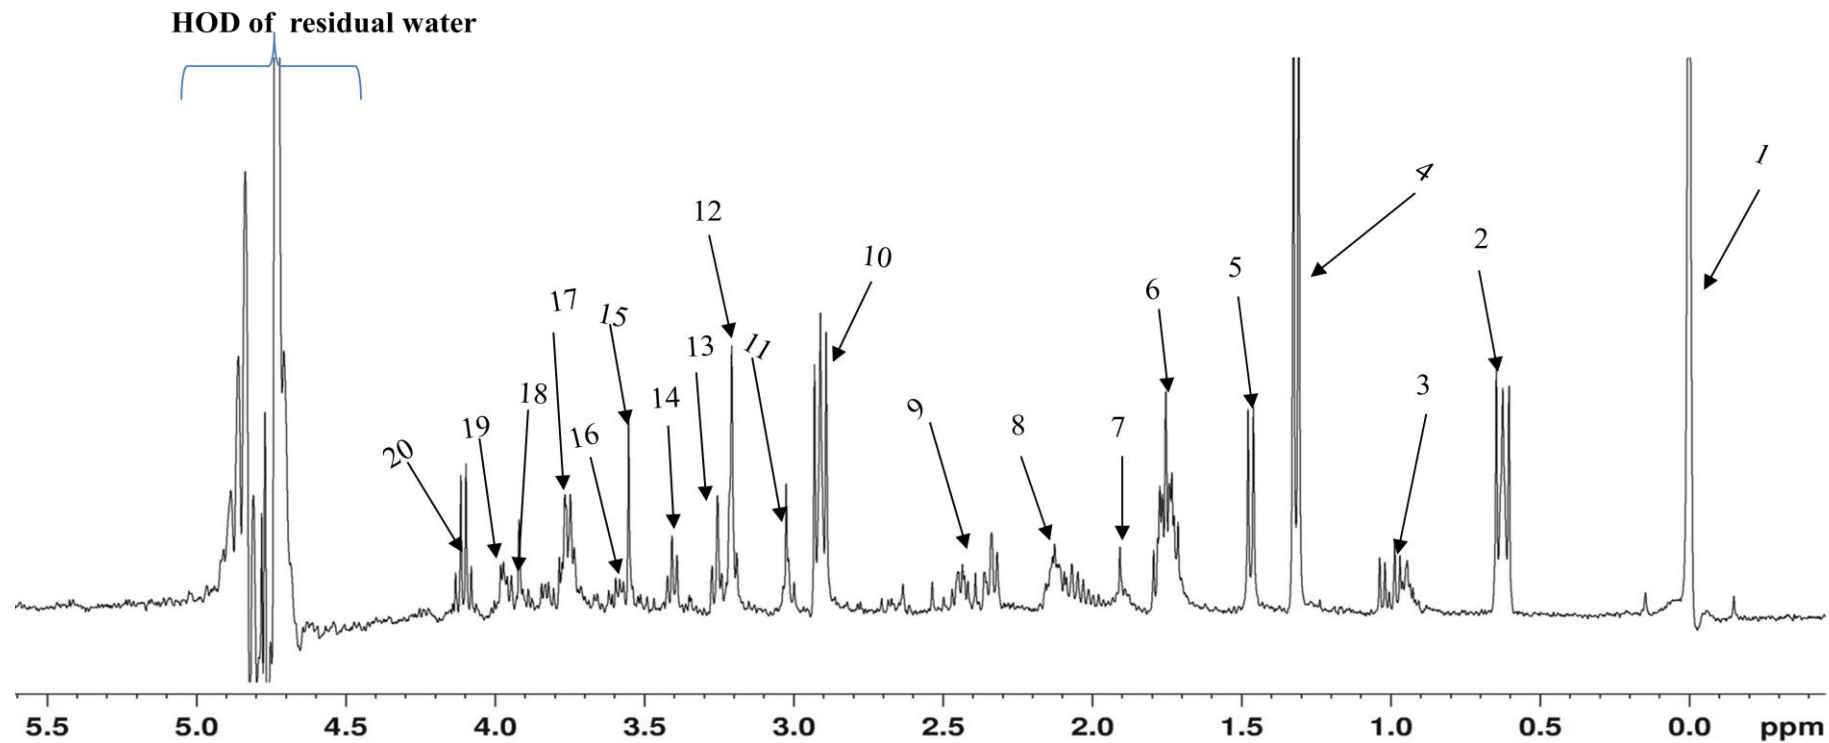

*S.I. Fig. 4: Solution state  $^1\text{H}$  NMR (400 MHz) spectra of the Rat embryo (cyclophosphamide treated group) highlighting various assignments between (0.0 to 5.5). The labelled assignments 1,2,6,10. DSS NMR standard; 3. unknown; 4,20. Lactate; 5, 17. alanine; 7. Acetate; 8,9,16. Glutamate; 11,18. Creatine; 12, 15, 19. choline; 13, 14. Taurine*

### S.I. Table

**S.I. Table 1.** Chemical shift assignments of metabolites observed in the HR-MAS  $^1\text{H}$ NMR spectra of control (distilled water) and Rat embryos treated with Cyclophosphamide obtained by comparing standard NMR spectrum (STD) of individual metabolites taken from Biological Magnetic Resonance Bank (BMRB).

| S. No. | Name of metabolites                   | Chemical Shift (ppm)                                                 | Resonances                                                                                                                           |
|--------|---------------------------------------|----------------------------------------------------------------------|--------------------------------------------------------------------------------------------------------------------------------------|
| 1      | Acetate                               | 1.92 (s)                                                             | $\text{CH}_3$                                                                                                                        |
| 2      | Alanine                               | 1.48 (d)<br>3.78 (q)                                                 | $\beta\text{-CH}_3$<br>$\alpha\text{-CH}$                                                                                            |
| 3      | Asparagine                            | 2.80 (dd)<br>2.95 (dd)<br>4.01 (dd)                                  | $\beta\text{-CH}$<br>$\beta'\text{-CH}$<br>$\alpha\text{-CH}$                                                                        |
| 4      | Aspartate                             | 2.45 (dd)<br>2.65 (dd)<br>3.90 (dd)                                  | $\beta\text{-CH}$<br>$\beta'\text{-CH}$<br>$\alpha\text{-CH}$                                                                        |
| 5      | Choline                               | 3.21 (s)<br>3.53 (s)<br>4.07 (s)                                     | $\text{N}(\text{CH}_3)_3$<br>$\text{N-CH}_2$<br>$\text{O-CH}_2$                                                                      |
| 6      | Creatine                              | 3.03 (s)<br>3.94 (s)                                                 | $\text{N-CH}_3$<br>$\text{N-CH}_2$                                                                                                   |
| 7      | Fatty acids (Triacylglycerols (TAGs)) | 0.90/0.96<br>1.3<br>1.59                                             | $\text{CH}_3$<br>$\text{-(CH}_2\text{)}_n\text{-}$<br>$\text{CH}_2\text{-CH}_2\text{-CO}$                                            |
| 8      | Glycerophosphocholine (GPC)           | 3.24 (s)<br>3.7<br>4.32                                              | $\text{N}(\text{CH}_3)_3$<br>$\text{N-CH}_2$<br>$\text{P-CH}_2$                                                                      |
| 9      | Glutamine                             | 2.13 (m)<br>2.44 (m)<br>3.77                                         | $\beta\text{-CH}_2$<br>$\gamma\text{-CH}_2$<br>$\alpha\text{-CH}$                                                                    |
| 10     | Glutamate                             | 2.02 (m)<br>2.33 (m)<br>3.74 (m)                                     | $\beta\text{-CH}_2$<br>$\gamma\text{-CH}_2$<br>$\alpha\text{-CH}$                                                                    |
| 11     | Glycine                               | 3.56 (s)                                                             | $\alpha\text{-CH}_2$                                                                                                                 |
| 12     | 3-Hydroxyglutaric acid                | 2.34 (t)                                                             | CH                                                                                                                                   |
| 13     | Isoleucine                            | 0.94 (t)<br>1.01 (d)<br>1.26 (m)<br>1.47 (m)<br>1.98 (m)<br>3.68 (d) | $\delta\text{-CH}_3$<br>$\gamma\text{-CH}_3$<br>$\gamma\text{-CH}$<br>$\gamma'\text{-CH}$<br>$\beta\text{-CH}$<br>$\alpha\text{-CH}$ |
| 14     | Lactate                               | 1.33 (d)<br>4.11 (q)                                                 | $\beta\text{-CH}_3$<br>$\alpha\text{-CH}$                                                                                            |
| 15     | Leucine                               | 0.96 (d)<br>0.97 (d)<br>1.71 (m)                                     | $\delta\text{-CH}_3$<br>$\delta'\text{-CH}_3$<br>$\gamma\text{-CH}/\beta\text{-CH}_2$                                                |

|           |                |          |                                  |
|-----------|----------------|----------|----------------------------------|
|           |                | 3.75     | $\alpha$ -CH                     |
| <b>16</b> | Lysine         | 1.47 (m) | $\gamma$ -CH <sub>2</sub>        |
|           |                | 1.72 (m) | $\beta$ -CH <sub>2</sub>         |
|           |                | 1.9 (m)  | $\delta$ -CH <sub>2</sub>        |
|           |                | 3.02     | N-CH <sub>2</sub>                |
|           |                | 3.74     | $\alpha$ -CH                     |
| <b>17</b> | Phosphocholine | 3.22     | N(CH <sub>3</sub> ) <sub>3</sub> |
|           |                | 3.62     | N-CH <sub>2</sub>                |
|           |                | 4.18     | O-CH <sub>2</sub>                |
| <b>18</b> | Taurine        | 3.25 (t) | S-CH <sub>2</sub>                |
|           |                | 3.41 (t) | N-CH <sub>2</sub>                |
| <b>19</b> | Valine         | 0.99 (d) | $\gamma$ -CH <sub>3</sub>        |
|           |                | 1.04 (d) | $\gamma'$ -CH <sub>3</sub>       |
|           |                | 3.62 (d) | $\beta$ -CH                      |
|           |                | 2.28     | $\alpha$ -CH                     |
